# Supplementary material for: Antisense Oligonucleotides Reduce RNA Foci in Spinocerebellar Ataxia 36 Patient iPSCs
Source: PubMed Central journal article supplement — Mol Ther Nucleic Acids. 2017 Jun 23;8:211–9. doi: 10.1016/j.omtn.2017.06.017 (PMC5504081; doi:10.1016/j.omtn.2017.06.017), 2017-06-23
Supplement: mmc1.pdf [file mmc1.pdf]

**OMTN, Volume 8**

## **Supplemental Information**

### **Antisense Oligonucleotides Reduce RNA Foci in Spinocerebellar Ataxia 36 Patient iPSCs**

**Kosuke Matsuzono, Keiko Imamura, Nagahisa Murakami, Kayoko Tsukita, Takuya Yamamoto, Yuishin Izumi, Ryuji Kaji, Yasuyuki Ohta, Toru Yamashita, Koji Abe, and Haruhisa Inoue**

## Supplemental Figures

**Figure S1**

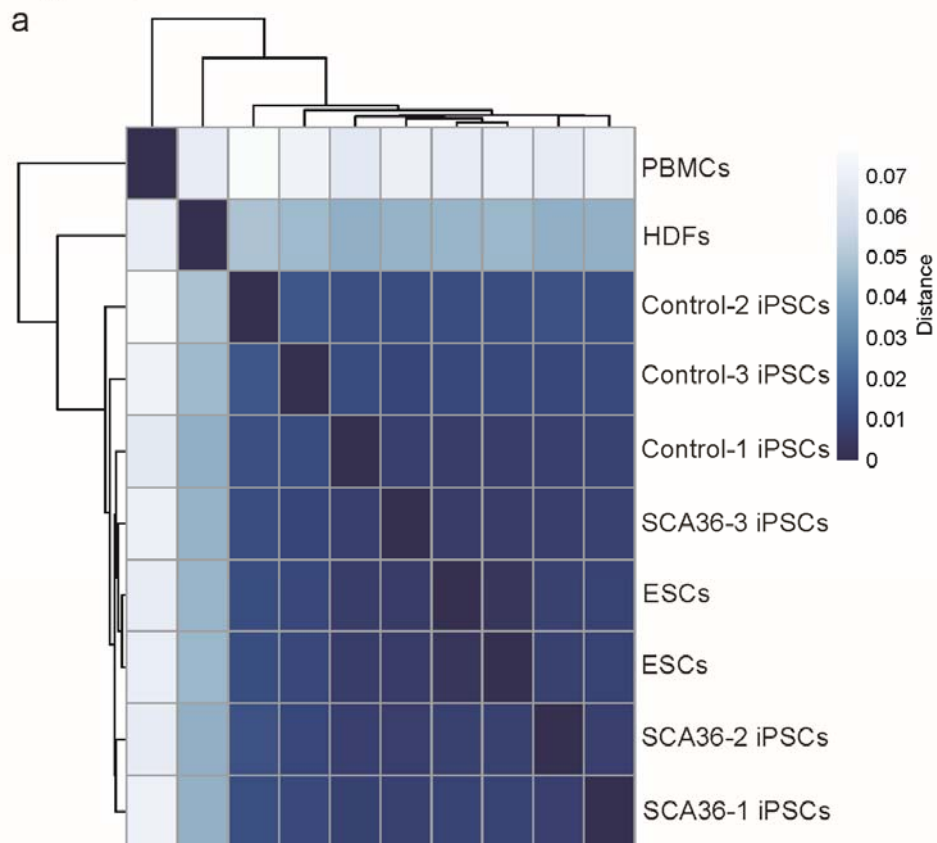

**Figure S1: RNA-Seq analysis**

All six iPSCs and embryonic stem cells (ESCs) for positive control were categorized in the same cluster, which was differentiated from HDF or PBMC clusters.

## Figure S2

a

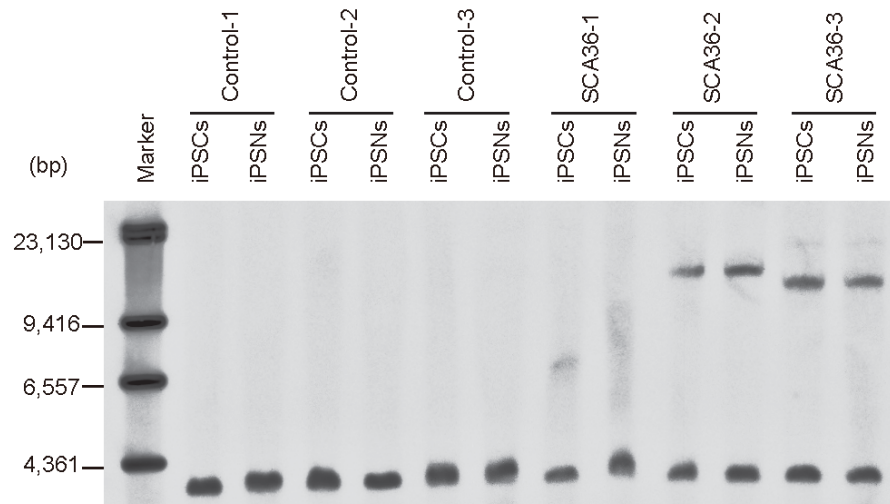

### Figure S2: Southern blot analysis of iPSCs and iPSNs

An expanded GGCCTG repeat allele was shown in the SCA36 patient iPSCs and the SCA36 patient iPSNs.

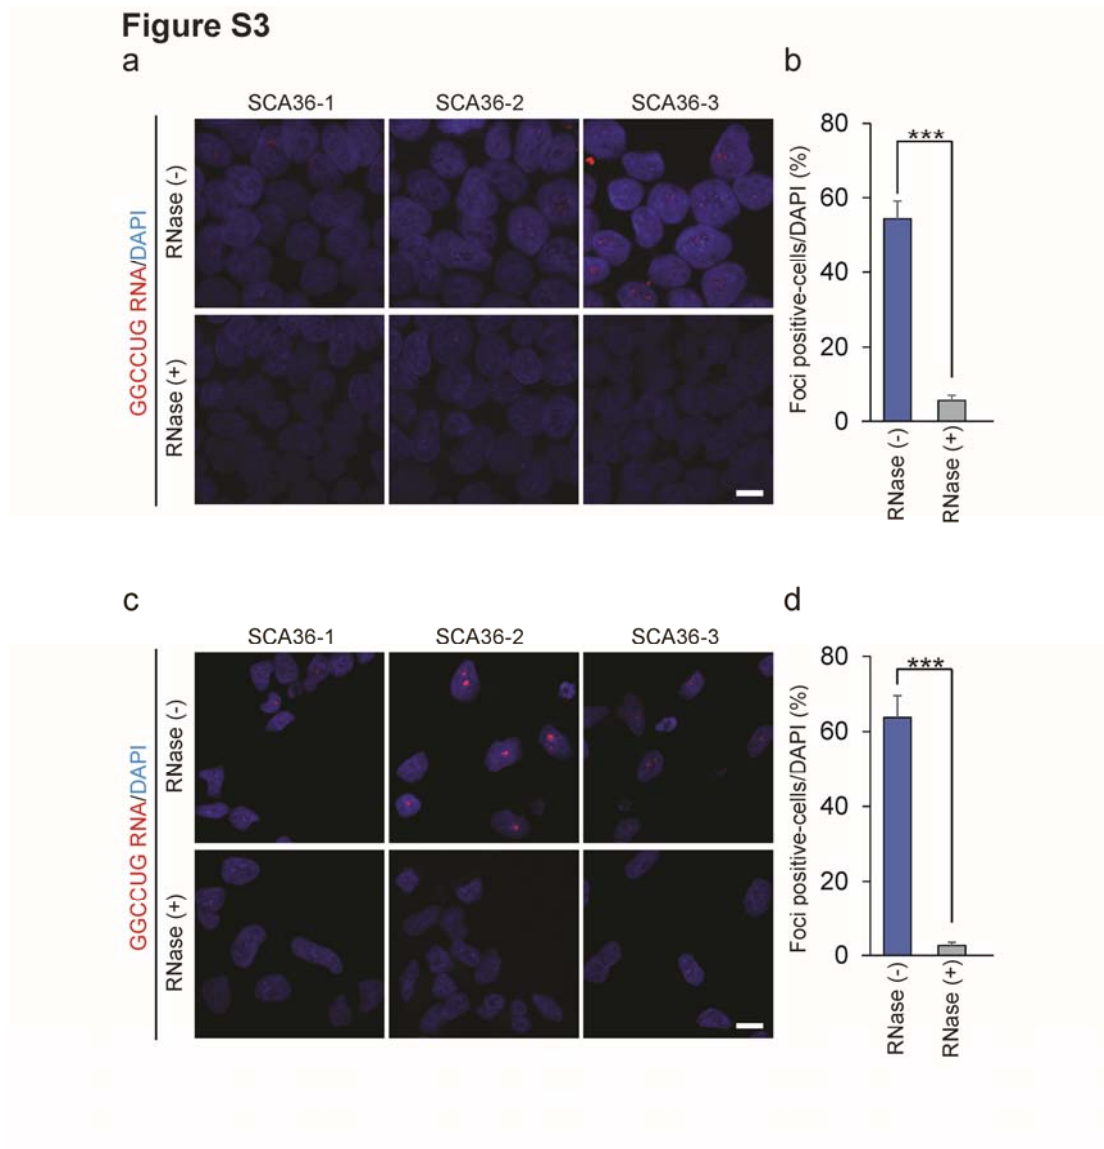

**Figure S3: RNA foci in SCA36 patient iPSCs and iPSNs disappeared by RNase A treatment**

(a) Sense RNA foci in SCA36 patient iPSCs disappeared by RNase A treatment. Scale bar:

10 $\mu$ m. (b) The graph shows that almost no RNA foci were detected by RNase A treatment.

\*\*\* $p < 0.001$ . Data presented as mean  $\pm$  SEM from  $n = 3$  clones. (c) Sense RNA foci in

SCA36 patient iPSNs disappeared by RNase A treatment. Scale bar: 10 $\mu$ m. (d) The graph shows that almost no RNA foci were detected by RNase A treatment. \*\*\* $p < 0.001$ . Data presented as mean  $\pm$  SEM from  $n = 3$  clones.

**Figure S4**

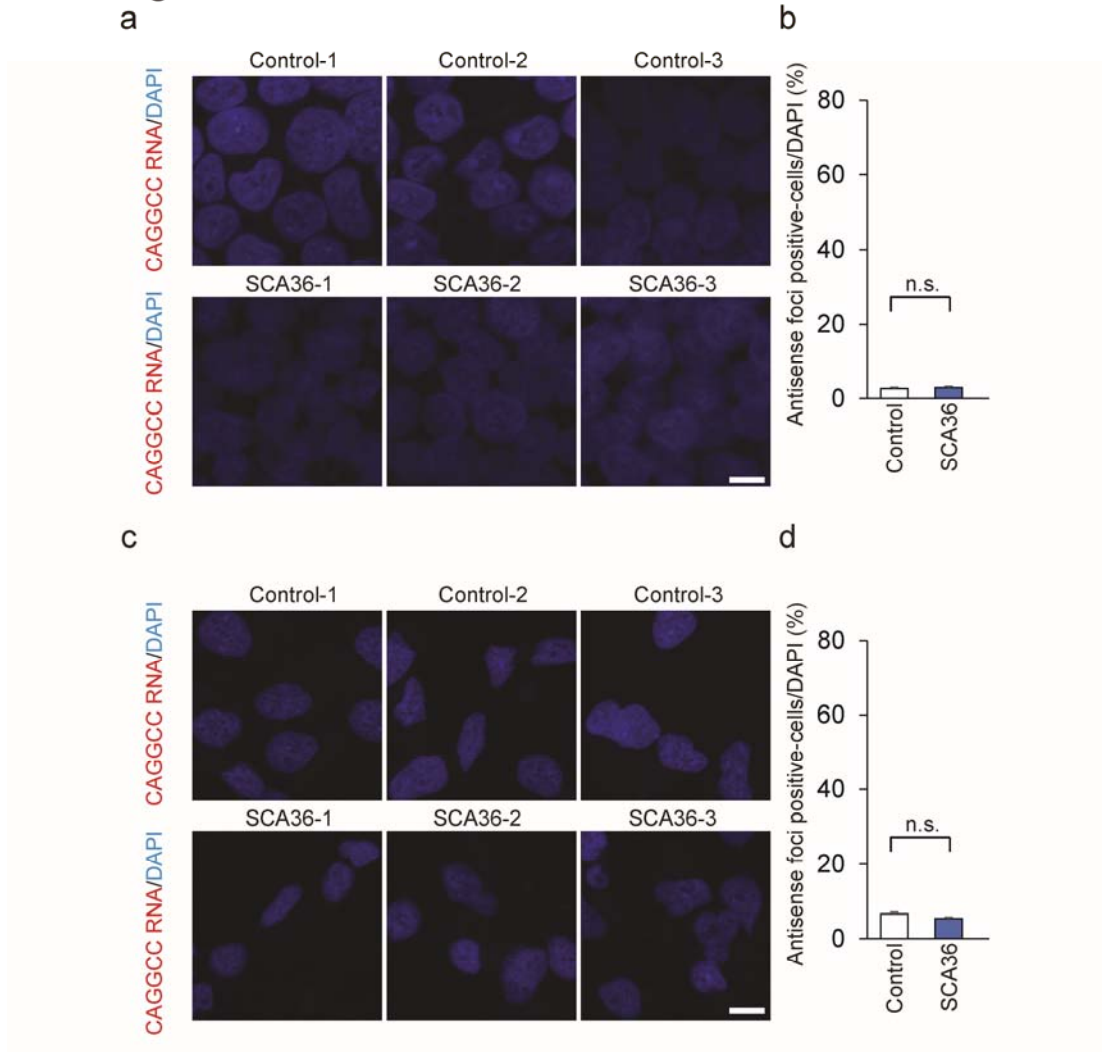

**Figure S4: Antisense RNA foci were not detected in SCA36 patient iPSCs or iPSNs.**

Fluorescence in situ hybridization (FISH) analysis was performed for each iPSC clone using a cy3-conjugated CUG(GGCCUG)<sub>2</sub>G locked nucleic acid oligonucleotide probe. (a) No antisense RNA foci were detected in either healthy control or SCA36 patient iPSCs. Scale bar: 10 $\mu$ m. (b) The graph shows that there were no significant CAGGCC RNA foci-positive cells in iPSCs. Data presented as mean  $\pm$  SEM from n = 3 clones. (c) No antisense RNA foci

were detected in either healthy control or SCA36 patient iPSNs. Scale bar: 10 $\mu$ m. (d) The graph shows that there were no significant CAGGCC RNA foci-positive cells in iPSNs. Data presented as mean  $\pm$  SEM from n = 3 clones.

**Figure S5**

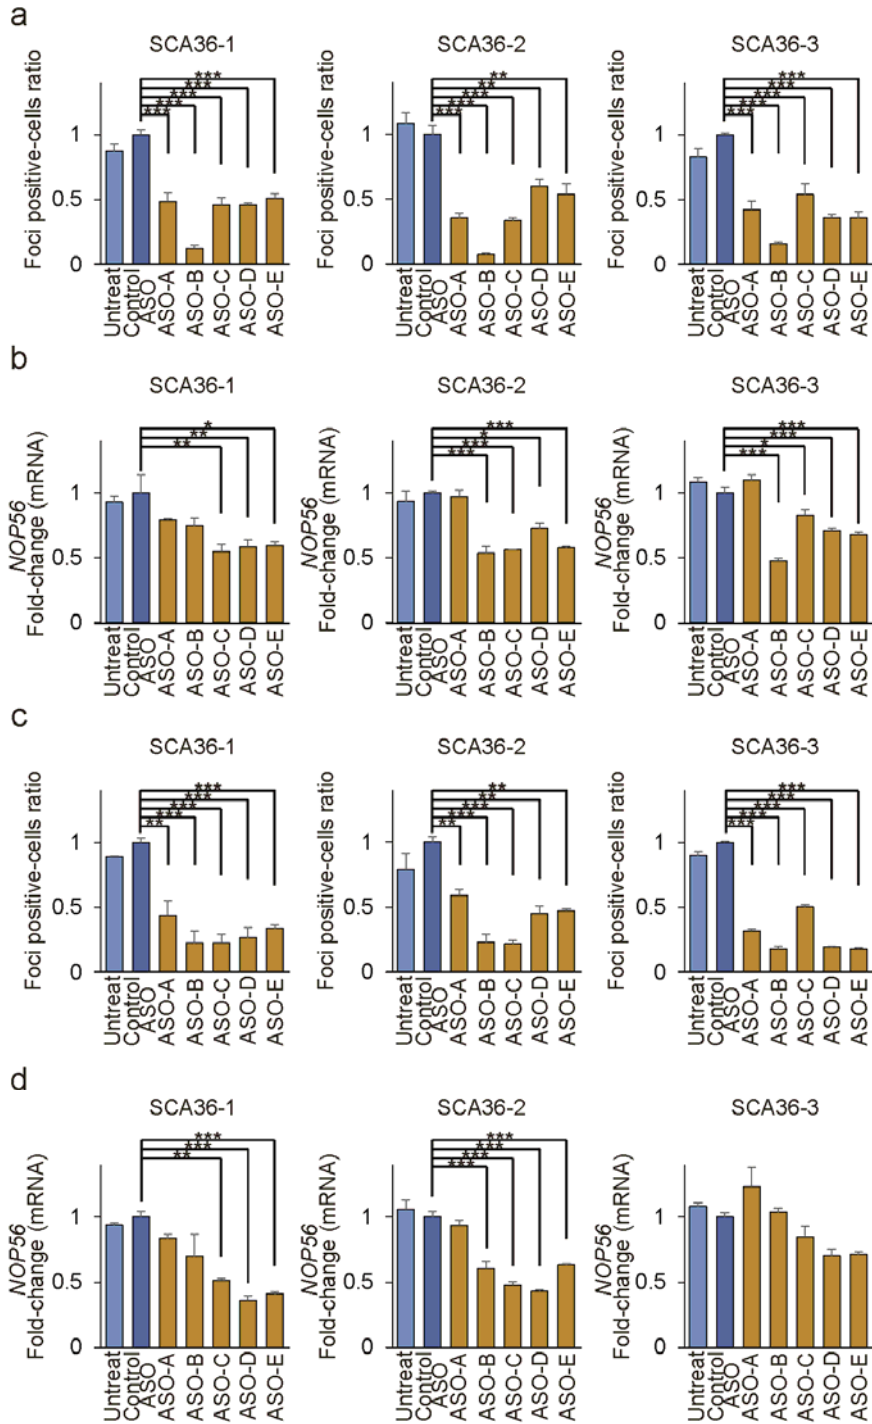



**Figure S5: The data of antisense oligonucleotides effectiveness in each SCA36 patient iPSC or iPSN clone.**

(a) The graph shows the number of RNA foci-positive cells in each SCA36 patient iPSC clone.  $**p < 0.01$ ,  $***p < 0.001$ . Data presented as mean  $\pm$  SEM from  $n = 3$  wells.

(b) The graph shows the *NOP56* mRNA expression levels in each SCA36 patient iPSC clone after ASO treatment.  $*p < 0.05$ ,  $**p < 0.01$ ,  $***p < 0.001$ . Data presented as mean  $\pm$  SEM from  $n = 3$  wells.

(c) The graph shows the number of RNA foci-positive cells in each SCA36 patient iPSN clone.  $**p < 0.01$ ,  $***p < 0.001$ . Data presented as mean  $\pm$  SEM from  $n = 3$  wells.

(d) The graph shows the *NOP56* mRNA expression levels in each SCA36 patient iPSN clone after ASO treatment.  $*p < 0.05$ ,  $**p < 0.01$ ,  $***p < 0.001$ . Data presented as mean  $\pm$  SEM from  $n = 3$  wells.

**Figure S6**

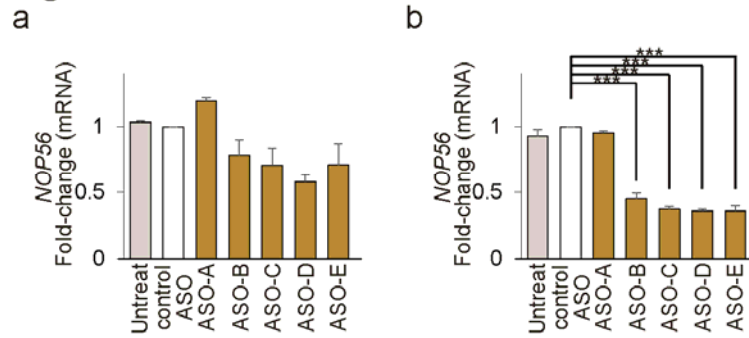

**Figure S6: The *NOP56* mRNA expression levels in healthy control iPSCs and iPSNs after ASO treatment.**

(a) The graph shows *NOP56* mRNA expression levels in healthy control iPSCs after ASO treatment. Data presented as mean  $\pm$  SEM from  $n = 3$  clones. (b) The graph shows *NOP56* mRNA expression levels in healthy control iPSNs after ASO treatment. \*\*\* $p < 0.001$ . Data presented as mean  $\pm$  SEM from  $n = 3$  clones.
